# Supplementary material for: Identification of Two Diamondback Moth Parasitoids, Diadegma fenestrale and Diadegma semiclausum, Using LAMP for Application in Biological Control
Source: MDPI journal article supplement (doi:10.3390/horticulturae8050366), 2022-04-22
Supplement: s1 [file s1]

Archive with 1 entries (1 files):
- horticulturae-1637570-supplementary.pdf
