# Supplementary material for: Identification of Two Diamondback Moth Parasitoids, Diadegma fenestrale and Diadegma semiclausum, Using LAMP for Application in Biological Control
Source: MDPI journal article supplement (doi:10.3390/horticulturae8050366), 2022-04-22
Supplement: s1 [file s1 › horticulturae-1637570-supplementary.pdf]

Article

# Supplementary Materials: Identification of Two Diamondback Moth Parasitoids, *Diadegma fenestrale* and *Diadegma semiclausum*, Using LAMP for Application in Biological Control

Hwayeun Nam, Min Kwon, Srinivasan Ramasamy and Juil Kim

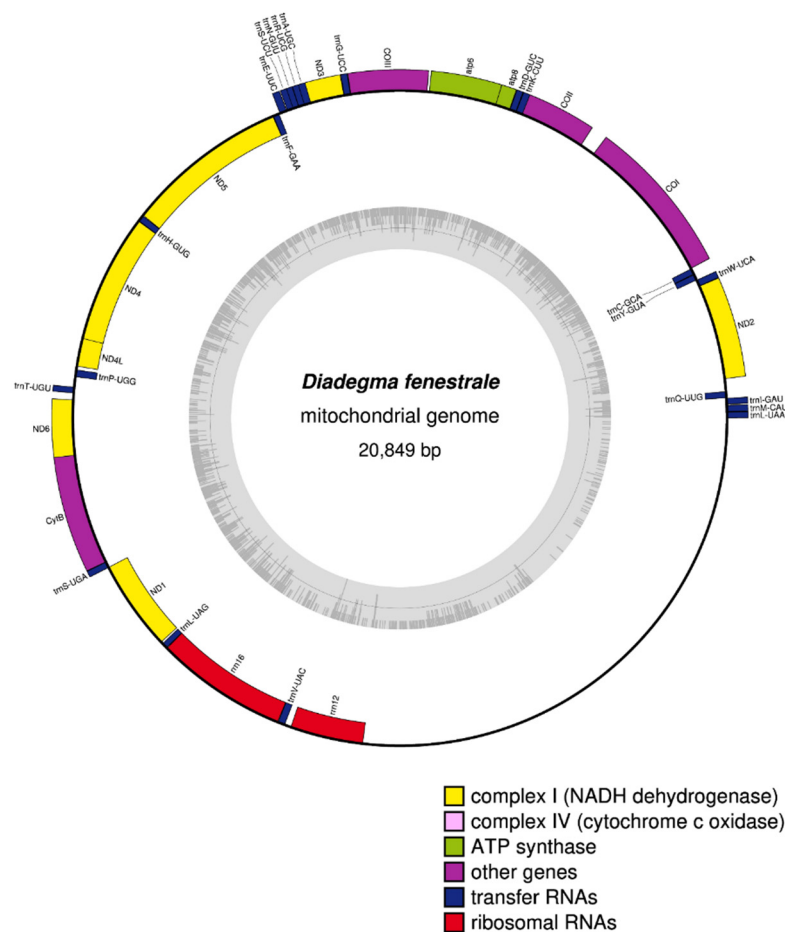

**Figure S1.** Organization of the mitochondrial genome of Korean population of *Diadegma fenestrale* (MN599978). ND: NADH dehydrogenase components (complex I) is shown in yellow. COX: cytochrome oxidase subunits (complex VI) is shown in pink. ATP synthase is shown in green. CYPB: cytochrome oxidase b is shown in purple. Ribosomal RNA genes are shown in red, and tRNA genes are shown in blue. Noncoding regions are not colored.

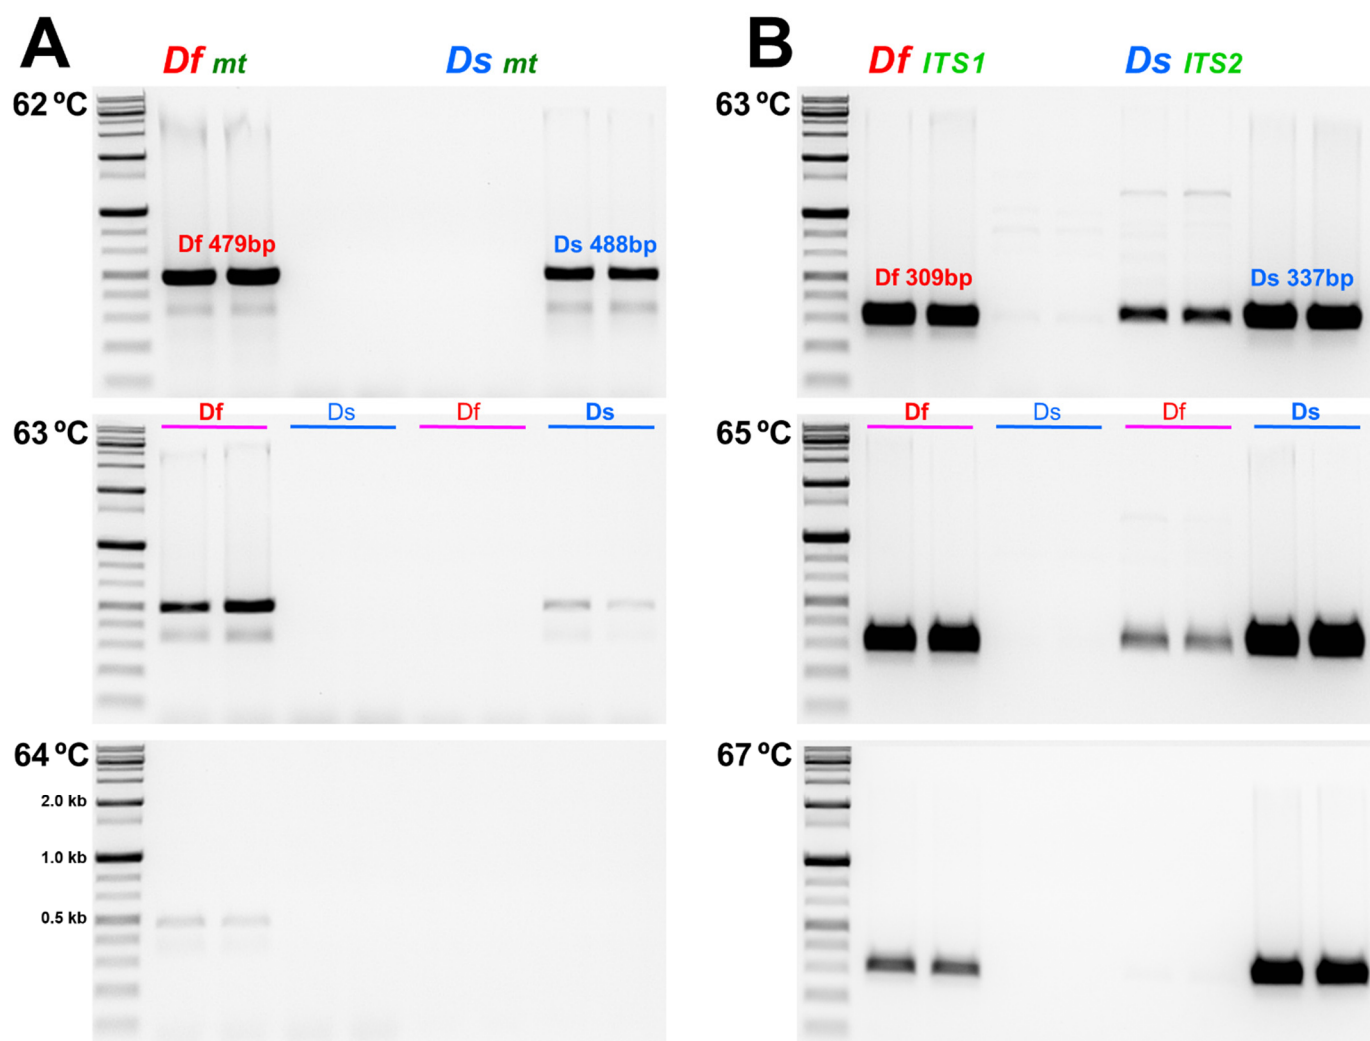

**Figure S2.** Conventional polymerase chain reaction (PCR) to distinguish *Df* and *Ds* by using specific primers in mt genome, ITS1, and ITS2. PCR with LAMP external primer set (A) based on mt genome used at three temperature conditions (62, 63, and 64 °C) and (B) based on ITS1 and ITS2 used at three temperature conditions (63, 65, and 67 °C). *Df*, *Diadegma fenestrale*; *Ds*, *Diadegma semiclausum*; DBM, diamondback moth; LAMP, loop-mediated isothermal amplification. PCR was performed under the following thermal conditions: initial denaturation at 95 °C for 1 min, followed by 35 cycles of 95 °C for 15 s, various annealing temperatures for 15 s, and 68 °C for 15 s, and final extension for 1 min at 68 °C.
